# Supplementary material for: Detonation performance enhancement through a positional isomerism modification strategy
Source: Royal Society of Chemistry journal article supplement (doi:10.1039/d2nj02515a), 2022-01-01
Supplement: d2nj02515a1.pdf [file d2nj02515a1.pdf]

## Supporting information

### Performance Enhancement through a Positional Isomerism

#### Modification Strategy

Yong Hu,<sup>a</sup> Zu-Jia Lu,<sup>a</sup> Wen-Shuai Dong,<sup>a</sup> Jian-Guo Zhang,<sup>\*a</sup> Valery P. Sinditskii<sup>b</sup>

<sup>a</sup> State Key Laboratory of Explosion Science and Technology, Beijing Institute of Technology, Beijing 100081, China.

<sup>b</sup> D Mendeleev University of Chemical Technology of Russia, 9 Moskva Sq., Moscow, Russia

|                                          |    |
|------------------------------------------|----|
| <b>Computational Details</b> .....       | 2  |
| <b>X-ray crystallographic Data</b> ..... | 2  |
| <b>NMR spectra</b> .....                 | 9  |
| <b>DSC curves</b> .....                  | 12 |
| <b>References</b> .....                  | 13 |

## Computational Details

Computations were performed by using the Gaussian09 suite of programs.<sup>1</sup> The geometric optimization and frequency analyses of the structures were calculated using B3LYP/6-31+G\*\* level and single energy points were calculated at the MP2/6-311++G\*\* level.<sup>2-4</sup> The gas phase heats of formation (HOF) for compounds **NPT** and **PTT** were calculated through designed isodesmic reactions (**Scheme S2**).

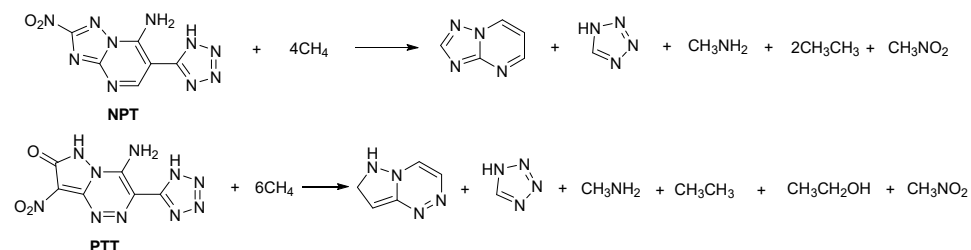

**Scheme S1** Isodesmic reactions for calculating heats of formation for **NPT** and **PTT**

The solid-state enthalpy of formation for neutral compound can be estimated by subtracting the heat of sublimation from gas-phase heat of formation.<sup>5</sup> The heat of sublimation can be estimated with Trouton's rule according to supplementary equation 1:

$$\Delta H_{sub} = \frac{188}{J \cdot mol^{-1} K^{-1}} \times T \quad (\text{supplementary equation 1})$$

where T represents either the melting point or the decomposition temperature when no melting occurs prior to decomposition.

## X-ray crystallographic Data

**Table S1.** Crystal parameters for compounds **2**, **NPT**, **TPTO** and **PTT**

| Compound                        | <b>2</b> ·CH <sub>3</sub> OH                                | <b>NPT</b> ·DMF                                               | <b>TPTO</b> ·NHMe <sub>2</sub> ·H <sub>2</sub> O                | <b>PTT</b> ·Mg <sub>0.5</sub> ·9H <sub>2</sub> O                                 |
|---------------------------------|-------------------------------------------------------------|---------------------------------------------------------------|-----------------------------------------------------------------|----------------------------------------------------------------------------------|
| formula                         | C <sub>7</sub> H <sub>7</sub> N <sub>7</sub> O <sub>3</sub> | C <sub>9</sub> H <sub>11</sub> N <sub>11</sub> O <sub>3</sub> | C <sub>16</sub> H <sub>23</sub> N <sub>18</sub> O <sub>10</sub> | C <sub>6</sub> H <sub>17</sub> Mg <sub>0.5</sub> N <sub>10</sub> O <sub>10</sub> |
| Temperature [K]                 | 298(2)                                                      | 298(2)                                                        | 298(2)                                                          | 113.90(14)                                                                       |
| Crystal system                  | orthorhombic                                                | monoclinic                                                    | monoclinic                                                      | monoclinic                                                                       |
| Space group                     | <i>Pnma</i> (62)                                            | <i>P2<sub>1</sub>/c</i>                                       | <i>P2<sub>1</sub>/m</i>                                         | <i>P2<sub>1</sub>/c</i>                                                          |
| A [Å]                           | 12.8331(13)                                                 | 6.9809(7)                                                     | 9.1828(9)                                                       | 9.323(2)                                                                         |
| B [Å]                           | 6.4142(7)                                                   | 6.8761(7)                                                     | 6.5037(8)                                                       | 26.924(6)                                                                        |
| C [Å]                           | 12.1223(14)                                                 | 28.243(3)                                                     | 11.7685(13)                                                     | 6.725(4)                                                                         |
| α [°]                           | 90.00                                                       | 90.00                                                         | 90.00                                                           | 90.00                                                                            |
| β [°]                           | 90.00                                                       | 92.736(2)                                                     | 95.504(3)                                                       | 108.46(4)                                                                        |
| γ [°]                           | 90.00                                                       | 90.00                                                         | 90.00                                                           | 90.00                                                                            |
| V [Å <sup>3</sup> ]             | 997.84(19)                                                  | 1354.2(2)                                                     | 699.60(13)                                                      | 1601.2(11)                                                                       |
| Z                               | 4                                                           | 4                                                             | 1                                                               | 4                                                                                |
| ρ [g·cm <sup>-3</sup> ]         | 1.57884                                                     | 1.576                                                         | 1.492                                                           | 1.665                                                                            |
| F(000)                          | 488.0                                                       | 664.0                                                         | 326.0                                                           | 836                                                                              |
| Crystal size [mm <sup>3</sup> ] | 0.36 × 0.20 × 0.16                                          | 0.36 × 0.30 × 0.08                                            | 0.32 × 0.27 × 0.05                                              | 0.29 × 0.12 × 0.08                                                               |

|                                   |                                            |                                            |                                            |                                            |
|-----------------------------------|--------------------------------------------|--------------------------------------------|--------------------------------------------|--------------------------------------------|
| 2 $\theta$ [°]                    | 4.62 to 50.04                              | 5.78 to 50.02                              | 4.46 to 50.04                              | 6.06 to 49.98                              |
| Index ranges                      | -15 ≤ h ≤ 15, -5 ≤ k                       | -6 ≤ h ≤ 8, -6 ≤ k ≤                       | -10 ≤ h ≤ 8, -7 ≤ k ≤                      | -11 ≤ h ≤ 7, -32 ≤ k ≤                     |
|                                   | ≤ 7, -14 ≤ l ≤ 14                          | 8, -33 ≤ l ≤ 33                            | 7, -14 ≤ l ≤ 12                            | 29, -5 ≤ l ≤ 7                             |
| Reflections collected             | 4706                                       | 6274                                       | 3498                                       | 6285                                       |
| Independent reflections           | 962                                        | 2371                                       | 1335                                       | 2796                                       |
| Goodness-of-fit on F <sup>2</sup> | 1.081                                      | 1.098                                      | 1.081                                      | 1.062                                      |
| Final R indexes [I ≥ 2σ           | R <sub>1</sub> = 0.0528, wR <sub>2</sub> = | R <sub>1</sub> = 0.0861, wR <sub>2</sub> = | R <sub>1</sub> = 0.0629, wR <sub>2</sub> = | R <sub>1</sub> = 0.0973, wR <sub>2</sub> = |
| (I)]                              | 0.1412                                     | 0.2121                                     | 0.1302                                     | 0.2214                                     |
| Final R indexes [all data]        | R <sub>1</sub> = 0.0722, wR <sub>2</sub> = | R <sub>1</sub> = 0.1203, wR <sub>2</sub> = | R <sub>1</sub> = 0.1194, wR <sub>2</sub> = | R <sub>1</sub> = 0.1533, wR <sub>2</sub> = |
|                                   | 0.1560                                     | 0.2279                                     | 0.1478                                     | 0.2571                                     |
| <b>CCDC</b>                       | <b>2168315</b>                             | <b>2168314</b>                             | <b>2168316</b>                             | <b>2133016</b>                             |

### Crystal structure plots and tables

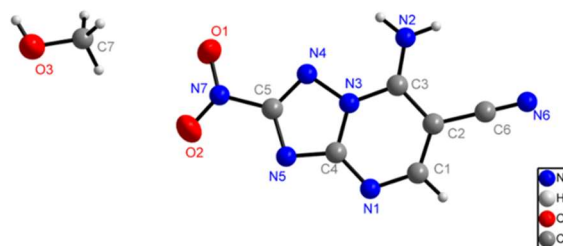

**Figure S1** The crystal structure of 2-MeOH

**Table S1** Bond Lengths for 2-MeOH

| Atom 1 | Atom 2 | Length/Å | Atom 1 | Atom 2 | Length/Å |
|--------|--------|----------|--------|--------|----------|
| N1     | C1     | 1.320(5) | N6     | C6     | 1.136(5) |
| N1     | C4     | 1.329(4) | N7     | O1     | 1.203(4) |
| N2     | C3     | 1.300(4) | N7     | O2     | 1.206(4) |
| N3     | C3     | 1.353(4) | N7     | C5     | 1.444(5) |
| N3     | N4     | 1.365(3) | O3     | C7     | 1.393(6) |
| N3     | C4     | 1.373(4) | C1     | C2     | 1.380(5) |
| N4     | C5     | 1.300(4) | C2     | C6     | 1.408(5) |
| N5     | C4     | 1.320(5) | C2     | C3     | 1.411(4) |

**Table S2** Bond Angles for 2-MeOH

| Atom 1 | Atom 2 | Atom 3 | Angle/°  | Atom 1 | Atom 2 | Atom 3 | Angle/°  |
|--------|--------|--------|----------|--------|--------|--------|----------|
| C1     | N1     | C4     | 114.4(3) | C6     | C2     | C3     | 119.4(3) |
| C3     | N3     | N4     | 124.5(2) | N2     | C3     | N3     | 119.8(3) |
| C3     | N3     | C4     | 124.8(3) | N2     | C3     | C2     | 128.1(3) |
| N4     | N3     | C4     | 110.6(3) | N3     | C3     | C2     | 112.1(3) |
| C5     | N4     | N3     | 99.4(2)  | N5     | C4     | N1     | 128.5(3) |
| C4     | N5     | C5     | 101.8(3) | N5     | C4     | N3     | 108.7(3) |

|    |    |    |          |    |    |    |          |
|----|----|----|----------|----|----|----|----------|
| O1 | N7 | C5 | 117.8(3) | N4 | C5 | N5 | 119.5(3) |
| N1 | C1 | C2 | 125.7(3) | N5 | C5 | N7 | 120.9(3) |
| C1 | C2 | C6 | 120.4(3) | N6 | C6 | C2 | 179.8(3) |

**Table S3** Torsion Angles for 2·MeOH

| Atom 1 | Atom 2 | Atom 3 | Atom 4 | Angle/°  | Atom 1 | Atom 2 | Atom 3 | Atom 4 | Angle/° |
|--------|--------|--------|--------|----------|--------|--------|--------|--------|---------|
| C3     | N3     | N4     | C5     | 180      | C1     | N1     | C4     | N3     | 0       |
| C4     | N3     | N4     | C5     | 0        | C3     | N3     | C4     | N5     | 180     |
| C4     | N1     | C1     | C2     | 0.000(1) | N4     | N3     | C4     | N5     | 0       |
| N1     | C1     | C2     | C6     | 180      | C3     | N3     | C4     | N1     | 0       |
| N1     | C1     | C2     | C3     | 0.000(1) | N4     | N3     | C4     | N1     | 180     |
| N4     | N3     | C3     | N2     | 0        | N3     | N4     | C5     | N5     | 0       |
| C4     | N3     | C3     | N2     | 180      | N3     | N4     | C5     | N7     | 180     |
| N4     | N3     | C3     | C2     | 180      | C4     | N5     | C5     | N4     | 0       |
| C4     | N3     | C3     | C2     | 0        | C4     | N5     | C5     | N7     | 180     |
| C1     | C2     | C3     | N2     | 180      | O1     | N7     | C5     | N4     | 0       |

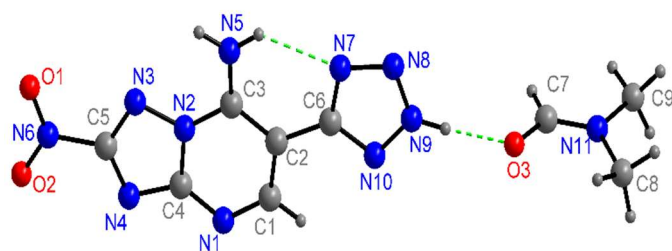

**Figure S2** The crystal structure of NPT-DMF

**Table S4** Bond Lengths for NPT-DMF

| Atom 1 | Atom 2 | Length/Å | Atom 1 | Atom 2 | Length/Å |
|--------|--------|----------|--------|--------|----------|
| N1     | C1     | 1.317(5) | N7     | C6     | 1.311(6) |
| N1     | C4     | 1.324(5) | N7     | N8     | 1.331(5) |
| N2     | N3     | 1.348(4) | N8     | N9     | 1.283(5) |
| N2     | C3     | 1.354(5) | N9     | N10    | 1.316(5) |
| N2     | C4     | 1.364(6) | N10    | C6     | 1.315(5) |
| N3     | C5     | 1.312(5) | N11    | C7     | 1.277(6) |
| N4     | C5     | 1.307(5) | N11    | C8     | 1.449(6) |
| N4     | C4     | 1.340(5) | N11    | C9     | 1.453(6) |
| N5     | C3     | 1.318(5) | O3     | C7     | 1.243(6) |
| N6     | O2     | 1.188(5) | C1     | C2     | 1.386(6) |
| N6     | O1     | 1.199(5) | C2     | C3     | 1.395(5) |
| N6     | C5     | 1.461(5) | C2     | C6     | 1.458(5) |

**Table S5** Bond Angles for NPT-DMF

| Atom 1 | Atom 2 | Atom 3 | Angle/°  | Atom 1 | Atom 2 | Atom 3 | Angle/°  |
|--------|--------|--------|----------|--------|--------|--------|----------|
| C1     | N1     | C4     | 114.4(4) | C1     | C2     | C3     | 119.2(4) |
| N3     | N2     | C3     | 125.6(3) | C1     | C2     | C6     | 120.1(4) |

|    |     |     |          |     |    |     |          |
|----|-----|-----|----------|-----|----|-----|----------|
| N3 | N2  | C4  | 110.6(3) | C3  | C2 | C6  | 120.7(4) |
| C3 | N2  | C4  | 123.8(3) | N5  | C3 | N2  | 118.1(3) |
| C5 | N3  | N2  | 99.2(3)  | N5  | C3 | C2  | 128.3(4) |
| C5 | N4  | C4  | 100.6(4) | N2  | C3 | C2  | 113.6(4) |
| O2 | N6  | O1  | 124.4(4) | N1  | C4 | N4  | 127.8(4) |
| O2 | N6  | C5  | 117.8(4) | N1  | C4 | N2  | 123.1(4) |
| O1 | N6  | C5  | 117.9(4) | N4  | C4 | N2  | 109.0(3) |
| C6 | N7  | N8  | 106.8(3) | N4  | C5 | N3  | 120.6(4) |
| N9 | N8  | N7  | 104.8(4) | N4  | C5 | N6  | 121.7(4) |
| N8 | N9  | N10 | 114.8(3) | N3  | C5 | N6  | 117.7(4) |
| C6 | N10 | N9  | 101.5(4) | N7  | C6 | N10 | 112.1(4) |
| C7 | N11 | C8  | 120.7(4) | N7  | C6 | C2  | 123.7(4) |
| C7 | N11 | C9  | 122.6(4) | N10 | C6 | C2  | 124.2(4) |
| C8 | N11 | C9  | 116.7(4) | O3  | C7 | N11 | 124.8(5) |
| N1 | C1  | C2  | 125.8(4) |     |    |     |          |

**Table S6** Torsion Angles for **NPT-DMF**

| Atom 1 | Atom 2 | Atom 3 | Atom 4 | Angle <sup>o</sup> | Atom 1 | Atom 2 | Atom 3 | Atom 4 | Angle <sup>o</sup> |
|--------|--------|--------|--------|--------------------|--------|--------|--------|--------|--------------------|
| C3     | N2     | N3     | C5     | -177.9(4)          | C3     | N2     | C4     | N1     | -2.4(6)            |
| C4     | N2     | N3     | C5     | 0.5(4)             | N3     | N2     | C4     | N4     | 0.2(4)             |
| C6     | N7     | N8     | N9     | -0.1(5)            | C3     | N2     | C4     | N4     | 178.7(3)           |
| N7     | N8     | N9     | N10    | 0.1(5)             | C4     | N4     | C5     | N3     | 1.4(5)             |
| N8     | N9     | N10    | C6     | -0.1(5)            | C4     | N4     | C5     | N6     | 178.4(3)           |
| C4     | N1     | C1     | C2     | 0.3(6)             | N2     | N3     | C5     | N4     | -1.2(5)            |
| N1     | C1     | C2     | C3     | -0.6(7)            | N2     | N3     | C5     | N6     | -178.4(3)          |
| N1     | C1     | C2     | C6     | 179.6(4)           | O2     | N6     | C5     | N4     | 1.8(6)             |
| N3     | N2     | C3     | N5     | 1.0(6)             | O1     | N6     | C5     | N4     | -178.9(4)          |
| C4     | N2     | C3     | N5     | -177.2(4)          | O2     | N6     | C5     | N3     | 178.9(4)           |
| N3     | N2     | C3     | C2     | -179.9(3)          | O1     | N6     | C5     | N3     | -1.7(6)            |
| C4     | N2     | C3     | C2     | 1.9(5)             | N8     | N7     | C6     | N10    | 0.1(5)             |
| C1     | C2     | C3     | N5     | 178.5(4)           | N8     | N7     | C6     | C2     | 179.8(4)           |
| C6     | C2     | C3     | N5     | -1.7(6)            | N9     | N10    | C6     | N7     | 0.0(5)             |
| C1     | C2     | C3     | N2     | -0.5(5)            | N9     | N10    | C6     | C2     | -179.8(4)          |
| C6     | C2     | C3     | N2     | 179.3(3)           | C1     | C2     | C6     | N7     | 177.5(4)           |
| C1     | N1     | C4     | N4     | 179.9(4)           | C3     | C2     | C6     | N7     | -2.3(6)            |
| C1     | N1     | C4     | N2     | 1.1(6)             | C1     | C2     | C6     | N10    | -2.7(6)            |
| C5     | N4     | C4     | N1     | -179.7(4)          | C3     | C2     | C6     | N10    | 177.5(4)           |
| C5     | N4     | C4     | N2     | -0.9(4)            | C8     | N11    | C7     | O3     | 1.6(7)             |
| N3     | N2     | C4     | N1     | 179.2(4)           | C9     | N11    | C7     | O3     | -179.5(5)          |

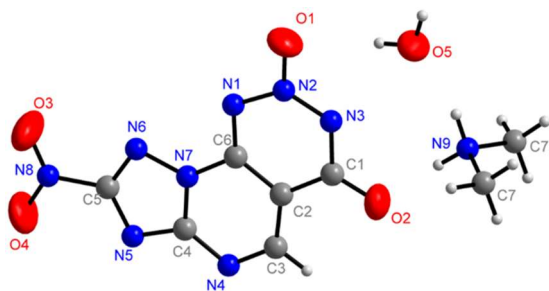

Figure S3 The crystal structure of TPTO·NHMe<sub>2</sub>·H<sub>2</sub>O

Table S7 Bond Lengths for TPTO·NHMe<sub>2</sub>·H<sub>2</sub>O

| Atom 1 | Atom 2 | Length/Å | Atom 1 | Atom 2 | Length/Å |
|--------|--------|----------|--------|--------|----------|
| O1     | N2     | 1.259(4) | N5     | C4     | 1.354(4) |
| O2     | C1     | 1.260(4) | N6     | C5     | 1.312(4) |
| O3     | N8     | 1.216(4) | N6     | N7     | 1.383(4) |
| N1     | C6     | 1.345(4) | N7     | C6     | 1.396(4) |
| N1     | N2     | 1.372(4) | N8     | C5     | 1.489(5) |
| N2     | N3     | 1.344(4) | C1     | C2     | 1.452(5) |
| N3     | C1     | 1.390(5) | C2     | C6     | 1.403(5) |
| N4     | C3     | 1.336(4) | C2     | C3     | 1.413(5) |
| N5     | C5     | 1.350(5) | N9     | C7     | 1.473(4) |

Table S8 Bond Angles for TPTO·NHMe<sub>2</sub>·H<sub>2</sub>O

| Atom 1 | Atom 2 | Atom 3 | Angle/°  | Atom 1 | Atom 2 | Atom 3 | Angle/°  |
|--------|--------|--------|----------|--------|--------|--------|----------|
| C6     | N1     | N2     | 111.5(3) | N3     | C1     | C2     | 118.5(3) |
| O1     | N2     | N3     | 116.7(3) | C6     | C2     | C3     | 120.0(3) |
| O1     | N2     | N1     | 115.0(3) | C6     | C2     | C1     | 114.8(3) |
| N3     | N2     | N1     | 128.3(3) | C3     | C2     | C1     | 125.2(4) |
| N2     | N3     | C1     | 118.4(3) | N4     | C3     | C2     | 125.0(4) |
| C3     | N4     | C4     | 114.7(3) | N5     | C4     | N4     | 127.8(4) |
| C5     | N5     | C4     | 101.6(3) | N5     | C4     | N7     | 108.3(3) |
| C5     | N6     | N7     | 99.8(3)  | N4     | C4     | N7     | 123.9(3) |
| C4     | N7     | N6     | 110.7(3) | N6     | C5     | N5     | 119.5(3) |
| C4     | N7     | C6     | 122.3(3) | N6     | C5     | N8     | 119.5(4) |
| N6     | N7     | C6     | 127.0(3) | N5     | C5     | N8     | 121.0(3) |
| O3     | N8     | O4     | 125.0(4) | N1     | C6     | N7     | 117.4(3) |
| O3     | N8     | C5     | 118.1(3) | N1     | C6     | C2     | 128.4(3) |
| O4     | N8     | C5     | 117.0(4) | N7     | C6     | C2     | 114.2(3) |
| O2     | C1     | N3     | 117.9(4) | C71    | N9     | C7     | 111.6(4) |

Table S9 Torsion Angles for TPTO·NHMe<sub>2</sub>·H<sub>2</sub>O

| Atom 1 | Atom 2 | Atom 3 | Atom 4 | Angle/° | Atom 1 | Atom 2 | Atom 3 | Atom 4 | Angle/° |
|--------|--------|--------|--------|---------|--------|--------|--------|--------|---------|
| C6     | N1     | N2     | O1     | 180     | N6     | N7     | C4     | N4     | 180     |
| C6     | N1     | N2     | N3     | 0       | C6     | N7     | C4     | N4     | 0       |
| O1     | N2     | N3     | C1     | 180     | N7     | N6     | C5     | N5     | 0       |

|    |    |    |    |     |    |    |    |    |     |
|----|----|----|----|-----|----|----|----|----|-----|
| N1 | N2 | N3 | C1 | 0   | N7 | N6 | C5 | N8 | 180 |
| C5 | N6 | N7 | C4 | 0   | C4 | N5 | C5 | N6 | 0   |
| C5 | N6 | N7 | C6 | 180 | C4 | N5 | C5 | N8 | 180 |
| N2 | N3 | C1 | O2 | 180 | O3 | N8 | C5 | N6 | 0   |
| N2 | N3 | C1 | C2 | 0   | O4 | N8 | C5 | N6 | 180 |
| O2 | C1 | C2 | C6 | 180 | O3 | N8 | C5 | N5 | 180 |
| N3 | C1 | C2 | C6 | 0   | O4 | N8 | C5 | N5 | 0   |
| O2 | C1 | C2 | C3 | 0   | N2 | N1 | C6 | N7 | 180 |
| N3 | C1 | C2 | C3 | 180 | N2 | N1 | C6 | C2 | 0   |
| C4 | N4 | C3 | C2 | 0   | C4 | N7 | C6 | N1 | 180 |
| C6 | C2 | C3 | N4 | 0   | N6 | N7 | C6 | N1 | 0   |
| C1 | C2 | C3 | N4 | 180 | C4 | N7 | C6 | C2 | 0   |
| C5 | N5 | C4 | N4 | 180 | N6 | N7 | C6 | C2 | 180 |
| C5 | N5 | C4 | N7 | 0   | C3 | C2 | C6 | N1 | 180 |
| C3 | N4 | C4 | N5 | 180 | C1 | C2 | C6 | N1 | 0   |
| C3 | N4 | C4 | N7 | 0   | C3 | C2 | C6 | N7 | 0   |
| N6 | N7 | C4 | N5 | 0   | C1 | C2 | C6 | N7 | 180 |
| C6 | N7 | C4 | N5 | 180 |    |    |    |    |     |

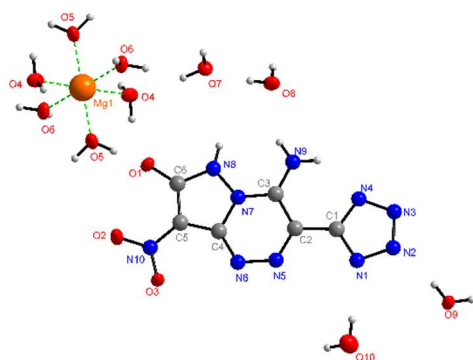

Figure S4 The asymmetric structure of TPTO·NHMe<sub>2</sub>·H<sub>2</sub>O

Table S10 Bond Lengths for PTT·Mg<sub>0.5</sub>·9H<sub>2</sub>O

| Atom 1 | Atom 2 | Length/Å | Atom 1 | Atom 2 | Length/Å |
|--------|--------|----------|--------|--------|----------|
| Mg1    | O6     | 2.127(5) | N3     | N4     | 1.341(7) |
| Mg1    | O4     | 2.156(5) | N10    | O2     | 1.242(7) |
| Mg1    | O5     | 2.055(5) | N10    | C5     | 1.393(8) |
| N9     | C3     | 1.311(8) | N1     | C1     | 1.350(8) |
| N7     | N8     | 1.376(7) | N4     | C1     | 1.336(8) |
| N7     | C3     | 1.331(8) | N5     | C2     | 1.334(8) |
| N7     | C4     | 1.404(7) | C2     | C3     | 1.444(9) |
| O1     | C6     | 1.274(7) | C2     | C1     | 1.463(8) |
| N8     | C6     | 1.368(8) | C4     | C5     | 1.398(8) |
| N6     | N5     | 1.345(7) | C5     | C6     | 1.445(9) |
| N6     | C4     | 1.327(8) |        |        |          |

**Table S11** Bond Angles for **PTT·Mg<sub>0.5</sub>·9H<sub>2</sub>O**

| Atom 1 | Atom 2 | Atom 3 | Angle/°   | Atom 1 | Atom 2 | Atom 3 | Angle/°  |
|--------|--------|--------|-----------|--------|--------|--------|----------|
| O6     | Mg1    | O4     | 91.47(17) | C1     | N4     | N3     | 104.2(5) |
| N8     | N7     | C4     | 112.9(4)  | C3     | C2     | C1     | 120.5(5) |
| C3     | N7     | N8     | 124.8(5)  | N9     | C3     | N7     | 121.4(6) |
| C3     | N7     | C4     | 122.3(5)  | N7     | C3     | C2     | 113.9(5) |
| C6     | N8     | N7     | 106.0(5)  | N6     | C4     | N7     | 122.0(5) |
| C4     | N6     | N5     | 117.4(5)  | N6     | C4     | C5     | 133.5(5) |
| N2     | N3     | N4     | 109.8(5)  | C5     | C4     | N7     | 104.4(5) |
| O3     | N10    | O2     | 122.2(5)  | N1     | C1     | C2     | 124.4(5) |
| O3     | N10    | C5     | 118.1(5)  | N4     | C1     | N1     | 112.3(5) |
| O1     | C6     | N8     | 122.5(6)  | N4     | C1     | C2     | 123.3(5) |
| O1     | C6     | C5     | 128.6(6)  | N10    | C5     | C4     | 125.6(6) |
| N8     | C6     | C5     | 108.9(5)  | N10    | C5     | C6     | 126.6(6) |
| C4     | C5     | C6     | 107.8(5)  |        |        |        |          |

**Table S12** Torsion Angles for **PTT·Mg<sub>0.5</sub>·9H<sub>2</sub>O**

| Atom 1 | Atom 2 | Atom 3 | Atom 4 | Angle/°   | Atom 1 | Atom 2 | Atom 3 | Atom 4 | Angle/°   |
|--------|--------|--------|--------|-----------|--------|--------|--------|--------|-----------|
| N7     | N8     | C6     | O1     | -178.9(6) | C4     | N7     | N8     | C6     | 0.4(7)    |
| N7     | N8     | C6     | C5     | 0.0(7)    | C4     | N7     | C3     | N9     | -178.8(6) |
| N7     | C4     | C5     | N10    | -178.9(6) | C4     | N7     | C3     | C2     | 0.8(8)    |
| N7     | C4     | C5     | C6     | 0.6(7)    | C4     | N6     | N5     | C2     | -0.8(9)   |
| N8     | N7     | C3     | N9     | 0.6(9)    | C4     | C5     | C6     | O1     | 178.4(7)  |
| N8     | N7     | C3     | C2     | -179.8(5) | C4     | C5     | C6     | N8     | -0.4(7)   |
| N8     | N7     | C4     | N6     | 179.2(6)  | O2     | N10    | C5     | C4     | -178.0(6) |
| N8     | N7     | C4     | C5     | -0.6(7)   | O2     | N10    | C5     | C6     | 2.6(10)   |
| N6     | N5     | C2     | C3     | 0.3(9)    | C1     | N1     | N2     | N3     | -1.0(7)   |
| N6     | N5     | C2     | C1     | 179.6(5)  | C1     | C2     | C3     | N9     | 0.0(10)   |
| N6     | C4     | C5     | N10    | 1.3(12)   | C1     | C2     | C3     | N7     | -179.6(6) |
| N6     | C4     | C5     | C6     | -179.2(7) | N5     | C2     | C3     | N9     | 179.3(6)  |
| O3     | N10    | C5     | C4     | 0.8(10)   | N5     | C2     | C3     | N7     | -0.3(9)   |
| O3     | N10    | C5     | C6     | -178.6(6) | N5     | C2     | C1     | N1     | 3.3(10)   |
| N3     | N4     | C1     | N1     | -0.6(7)   | N5     | C2     | C1     | N4     | -176.9(6) |
| N3     | N4     | C1     | C2     | 179.5(6)  | N2     | N3     | N4     | C1     | 0.0(7)    |
| N10    | C5     | C6     | O1     | -2.1(11)  | N2     | N1     | C1     | N4     | 1.0(7)    |
| N10    | C5     | C6     | N8     | 179.1(6)  | N2     | N1     | C1     | C2     | -179.2(6) |
| N4     | N3     | N2     | N1     | 0.7(8)    | C3     | N7     | N8     | C6     | -179.1(6) |
| N5     | N6     | C4     | N7     | 1.2(9)    | C3     | N7     | C4     | N6     | -1.3(9)   |



## NMR spectra

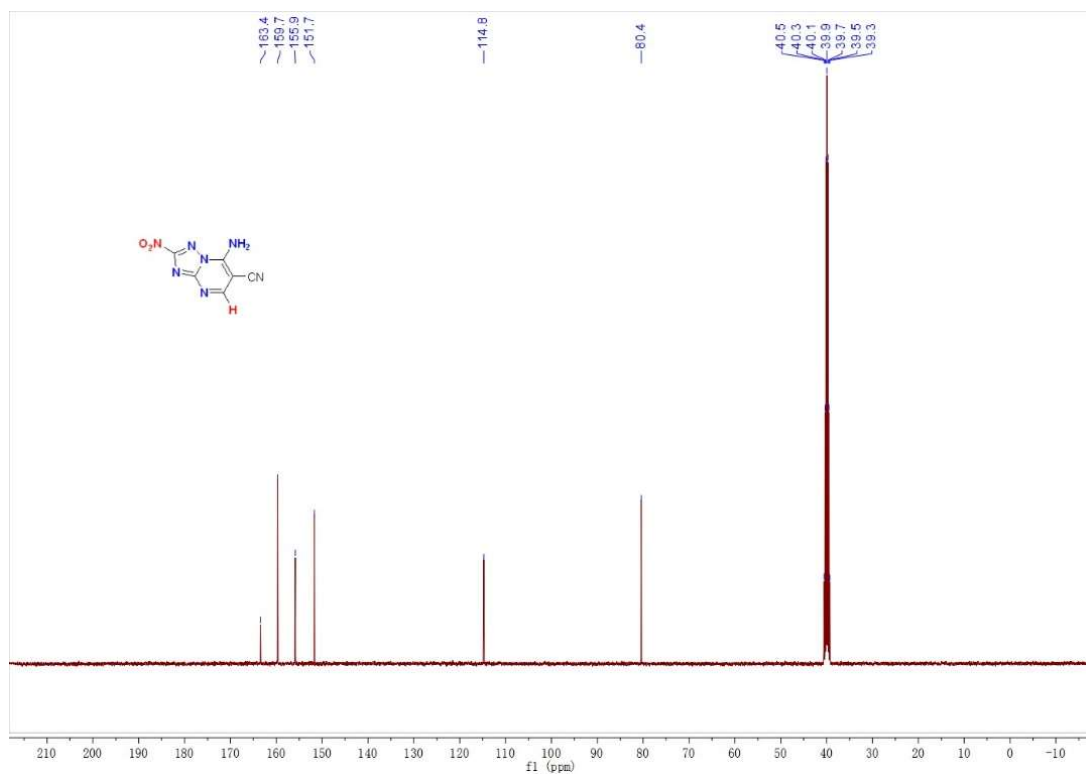

Figure S5  $^{13}\text{C}$  NMR spectra in  $\text{DMSO-}d_6$  for compound 2.

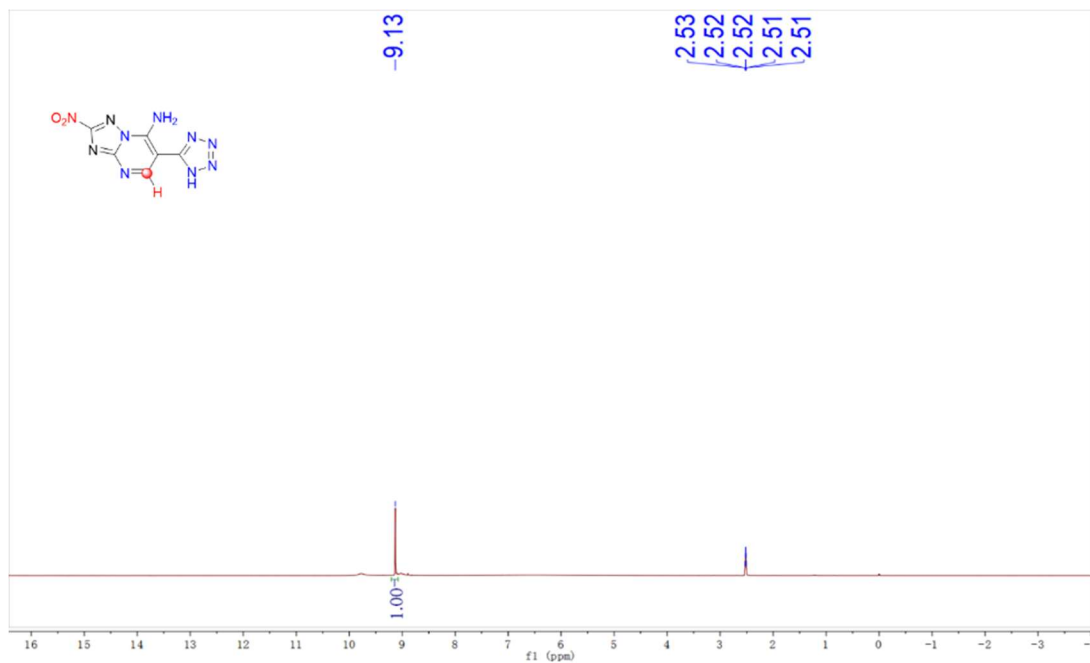

Figure S6  $^1\text{H}$  NMR spectra in  $\text{DMSO-}d_6$  for compound NPT

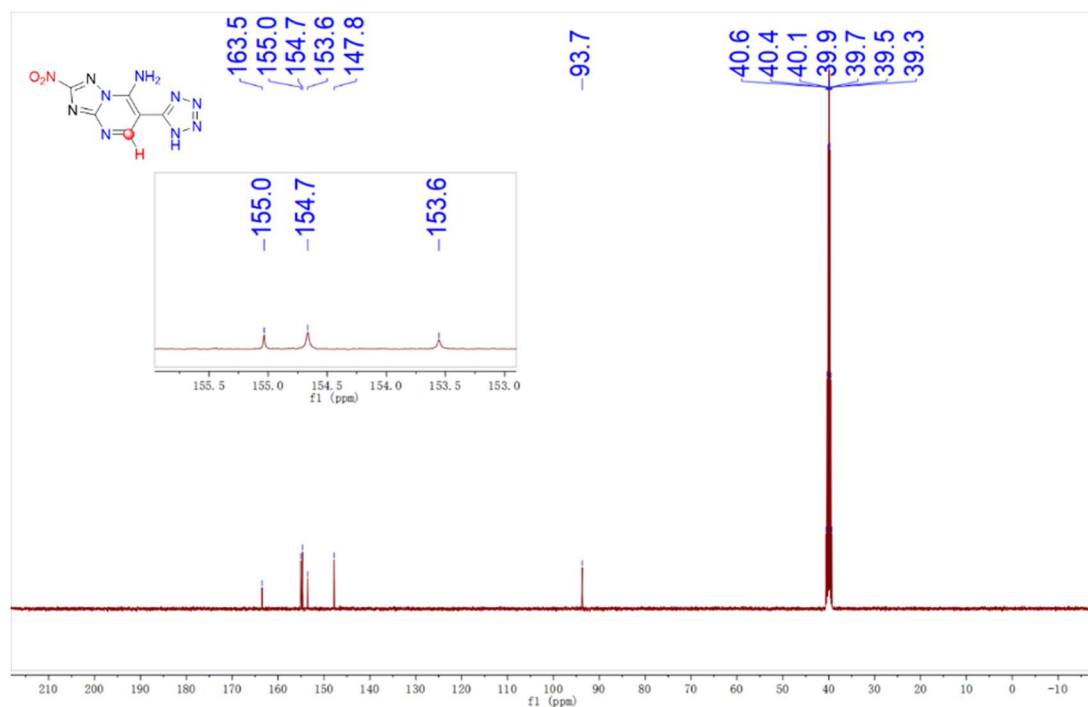

Figure S7  $^{13}\text{C}$  NMR spectra in  $\text{DMSO-}d_6$  for compound NPT.

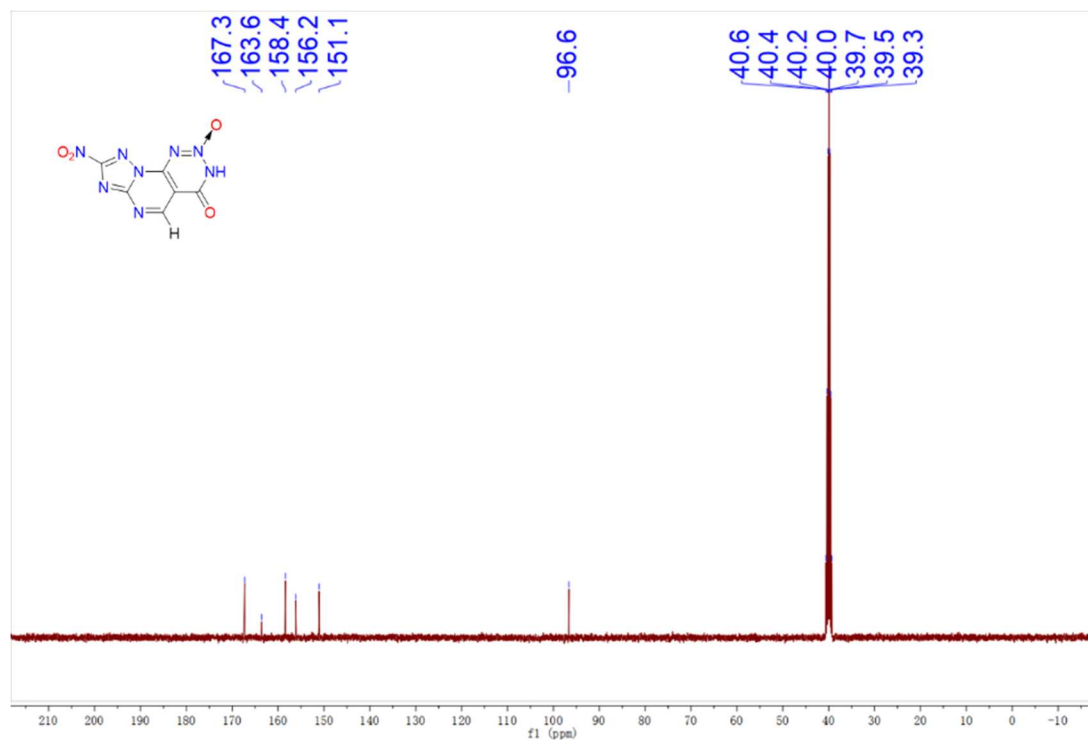

Figure S8  $^{13}\text{C}$  NMR spectra in  $\text{DMSO-}d_6$  for compound TPTO.

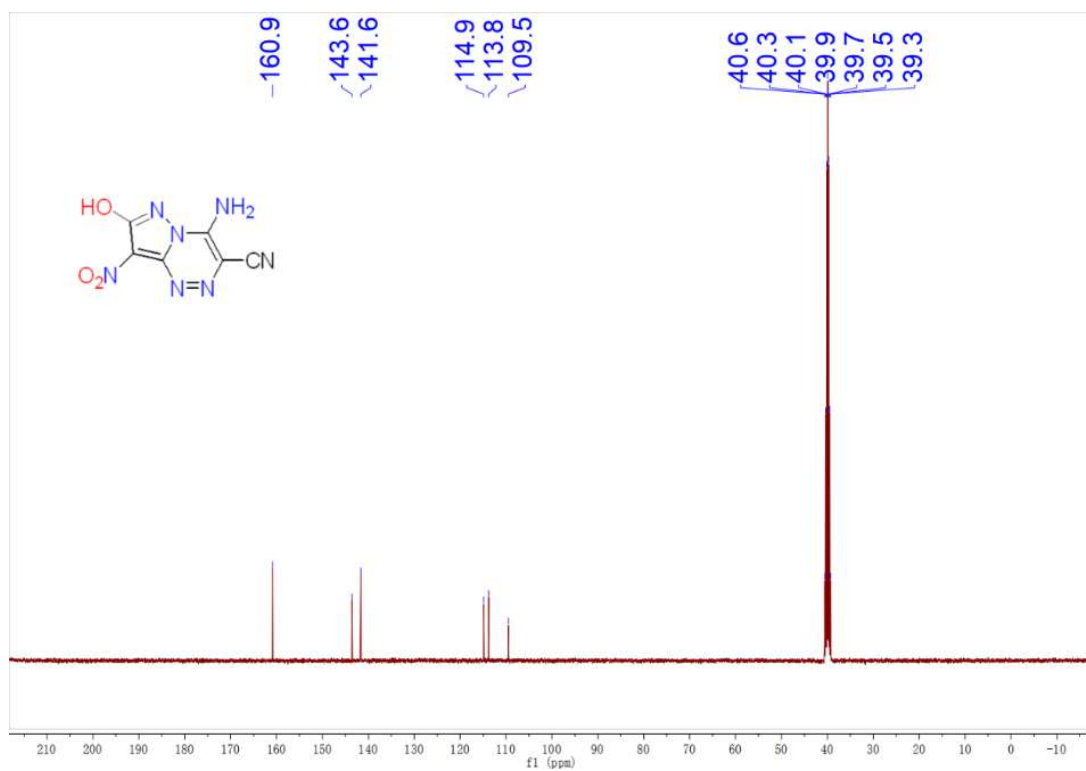

Figure S9  $^{13}\text{C}$  NMR spectra in  $\text{DMSO-}d_6$  for compound 4.

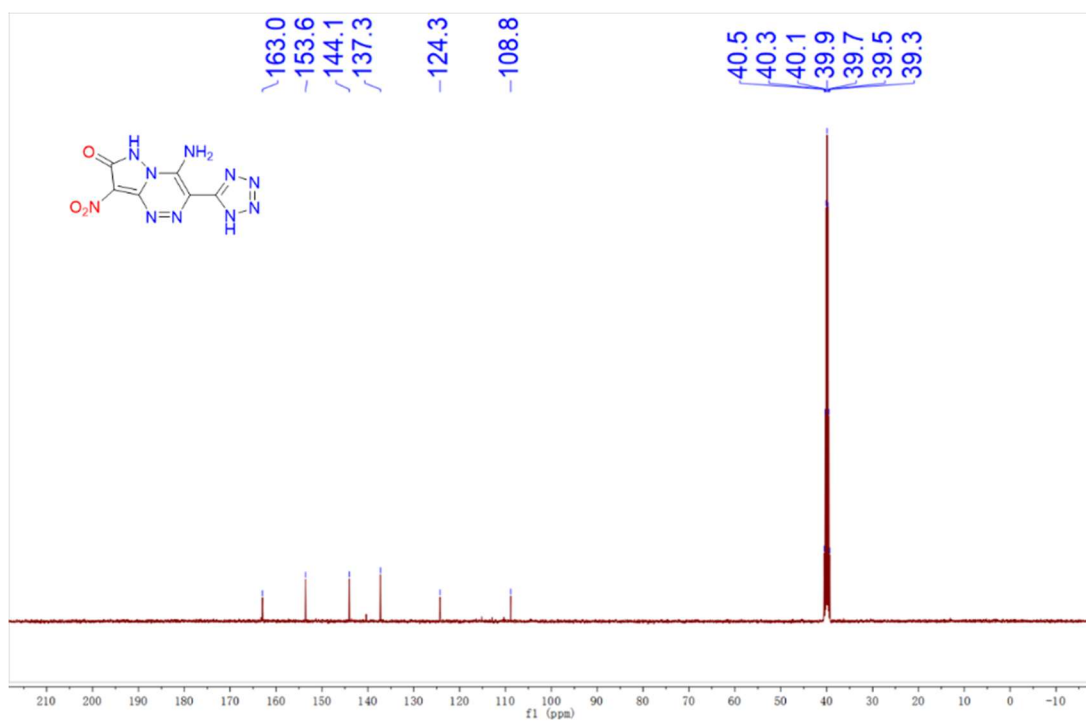

Figure S10  $^{13}\text{C}$  NMR spectra in  $\text{DMSO-}d_6$  for compound PTT.

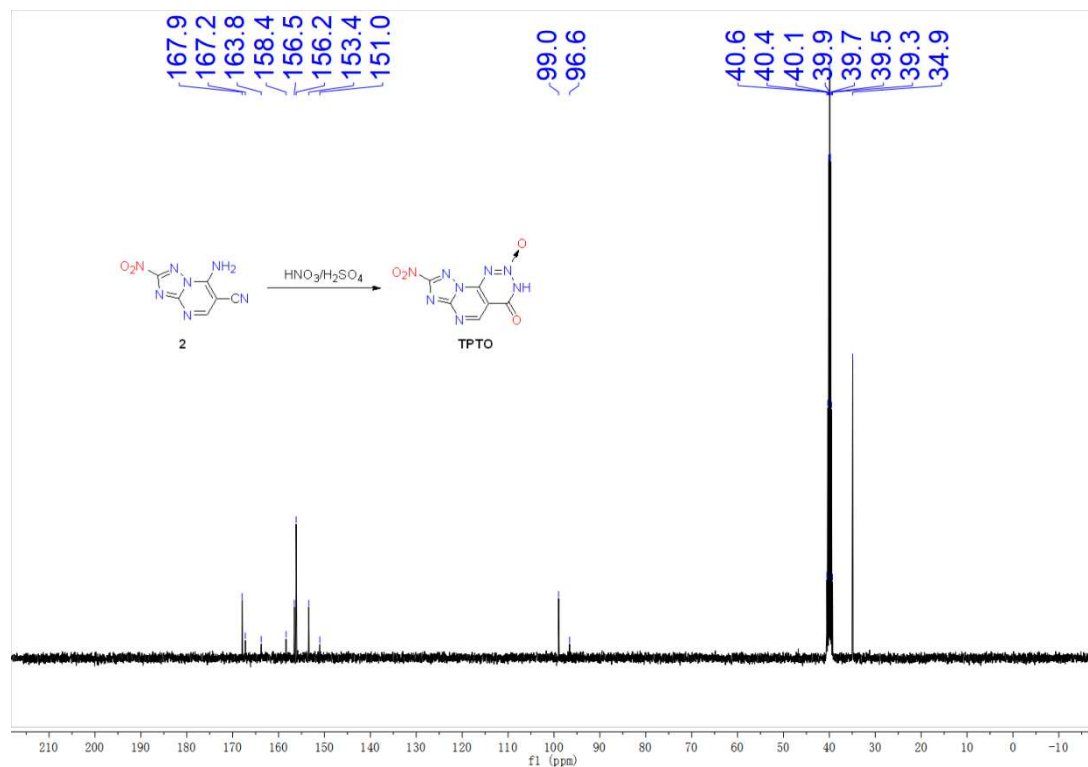

Figure S11  $^{13}\text{C}$  NMR spectra in  $\text{DMSO-}d_6$  for nitration compound obtained from compound **2**.

## DSC curves

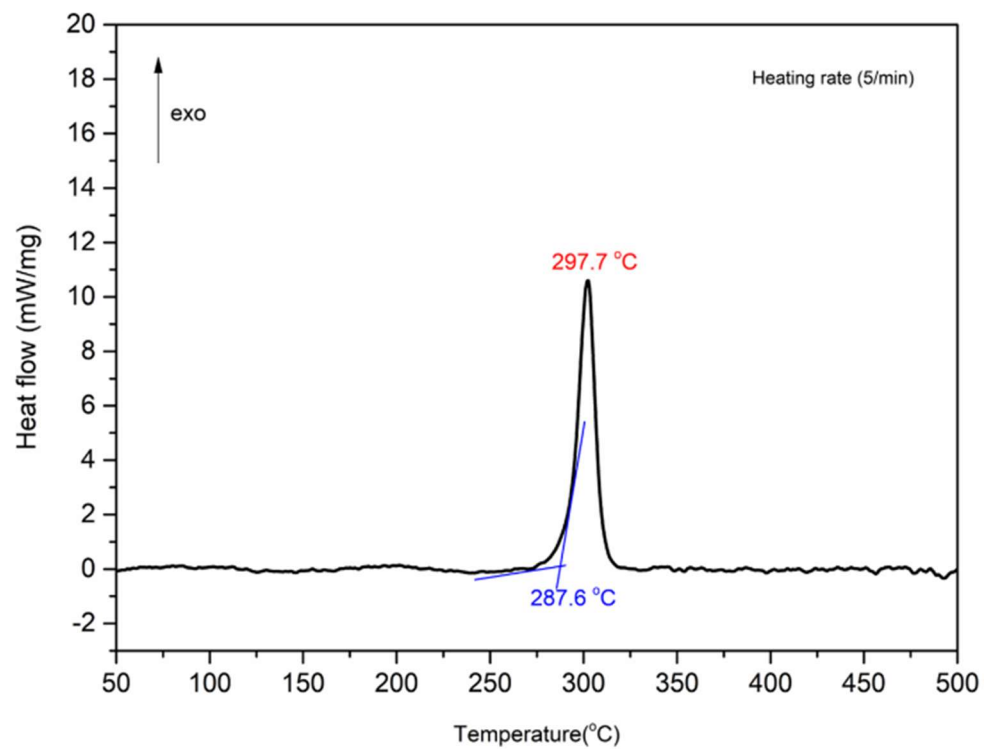

Figure S12 DSC curve of NPT measured at a heating rate of  $5\text{ °C}\cdot\text{min}^{-1}$  (exo up).

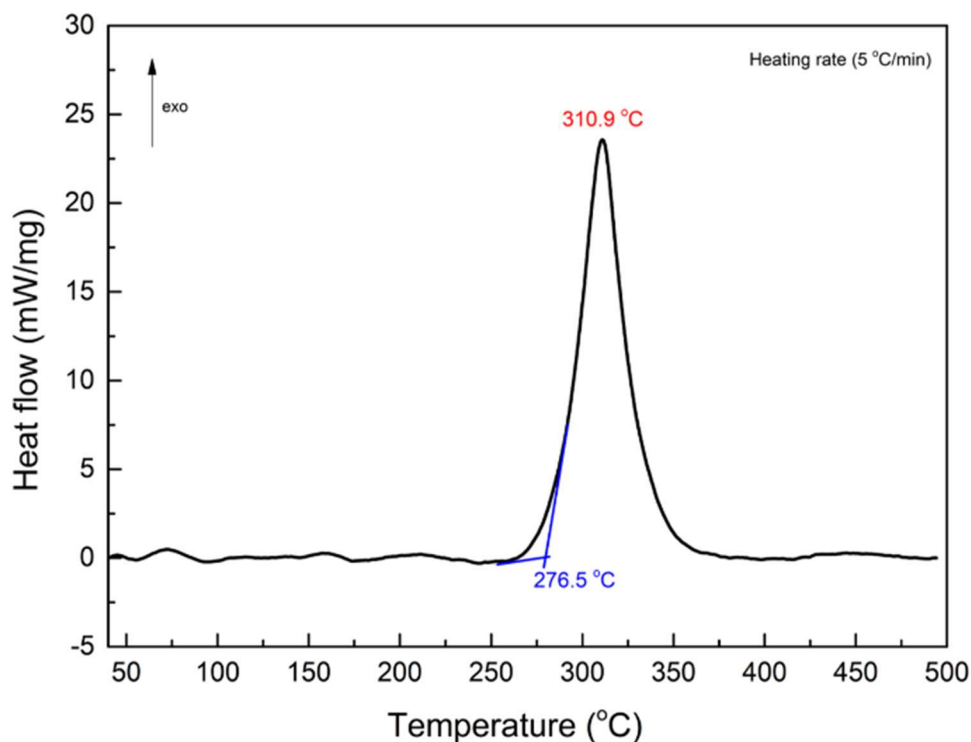

Figure S13 DSC curve of PTT measured at a heating rate of 5 °C·min<sup>-1</sup> (exo up).

## References

1. M. J. Frisch, G. W. Trucks, H. B. Schlegel, G. E. Scuseria, M. A. Robb, J. R. Cheeseman, V. G. Zakrzewski, J. A. Montgomery, R. E. Stratmann, J. C. Burant, S. Dapprich, J. M. Millam, A. D. Daniels, K. N. Kudin, M. C. Strain, O. Farkas, J. Tomasi, V. Barone, M. Cossi, R. Cammi, B. Mennucci, C. Pomelli, C. Adamo, S. Clifford, J. Ochterski, G. A. Petersson, P. Y. Ayala, Q. Cui, K. Morokuma, D. K. Malick, A. D. Rabuck, K. Raghavachari, J. B. Foresman, J. Cioslowski, J. V. Ortiz, A. G. Baboul, B. B. Stefanov, G. Liu, A. Liashenko, P. Piskorz, I. Komaromi, R. Gomperts, R. L. Martin, D. J. Fox, T. Keith, M. A. Laham, C. Y. Peng, A. Nanayakkara, C. Gonzalez, M. Challacombe, P. M. W. Gill, B. Johnson, W. Chen, M. W. Wong, J. L. Andres, C. Gonzalez, M. Head-Gordon, E. S. Replogle and J. A. Pople, Gaussian 09, revision A. 01; Gaussian, Inc.: Wallingford, CT, 2009.
- 2 (a) A. D. Becke, *J. Chem. Phys.*, 1993, **98**, 5648–5652; (b) P. J. Stephens, F. J. Devlin, C. F. Chabalowski, M. J. Frisch, *J. Phys. Chem.*, 1994, **98**, 11623–11627.
- 3 P. C. Hariharan and J. A. Pople, *Theor. Chim. Acta.*, 1973, **28**, 213–222.
- 4 J. W. Ochterski, G. A. Petersson, J. A. Montgomery, *J. Chem. Phys.*, 1996, **104**, 2598–2619.
- 5 (a) F. Trouton and *Philos. Mag.* 1884, **18**, 54–57; (b) M. S. Westwell, M. S. Searle, D. J. Wales and D. H. Williams, *J. Am. Chem. Soc.*, 1995, **117**, 5013–5015.
